# Supplementary material
Source: PubMed Central journal article supplement (PMC8612976)
Supplement: NIHMS1746094-supplement-1.pdf [file NIHMS1746094-supplement-1.pdf]

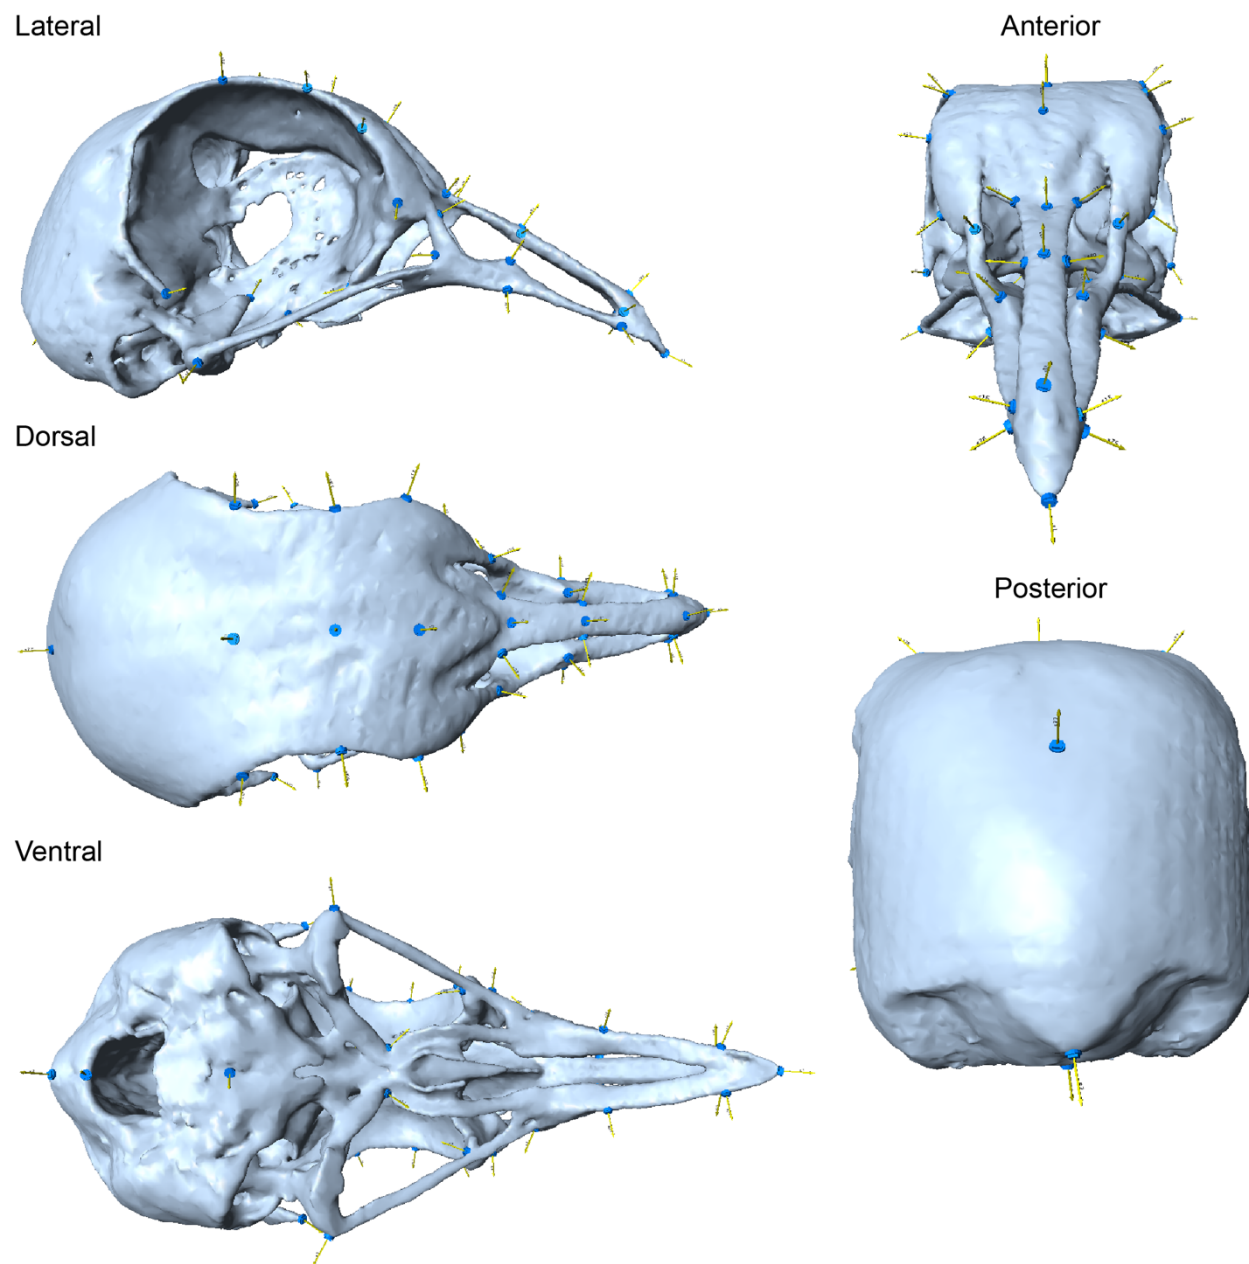

**Figure S1. Pigeon craniofacial landmark atlas, related to Figures 1-2. Landmarks are indicated by blue discs.**

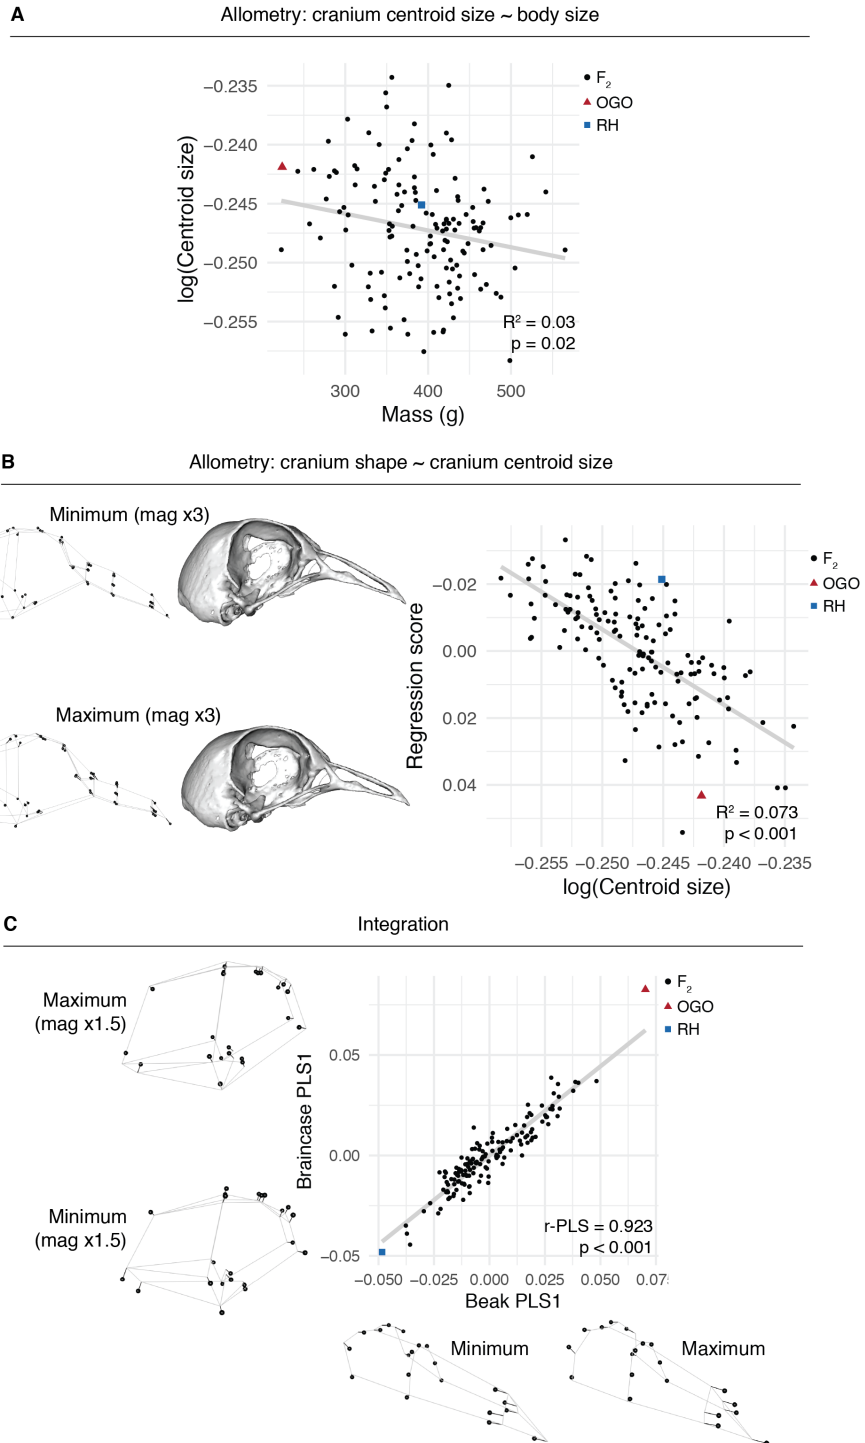

**Supplemental Figure 2. Allometry and integration in the RH x OGO cross, related to Figures 1-2.** (A) Cranium centroid size ~ body size (mass) linear regression. (B) Cranium shape ~ centroid size linear regression. (B) Beak vs. braincase PLS1 shapes. Minimum and maximum shapes are depicted as wireframes and/or warped meshes along corresponding axis.

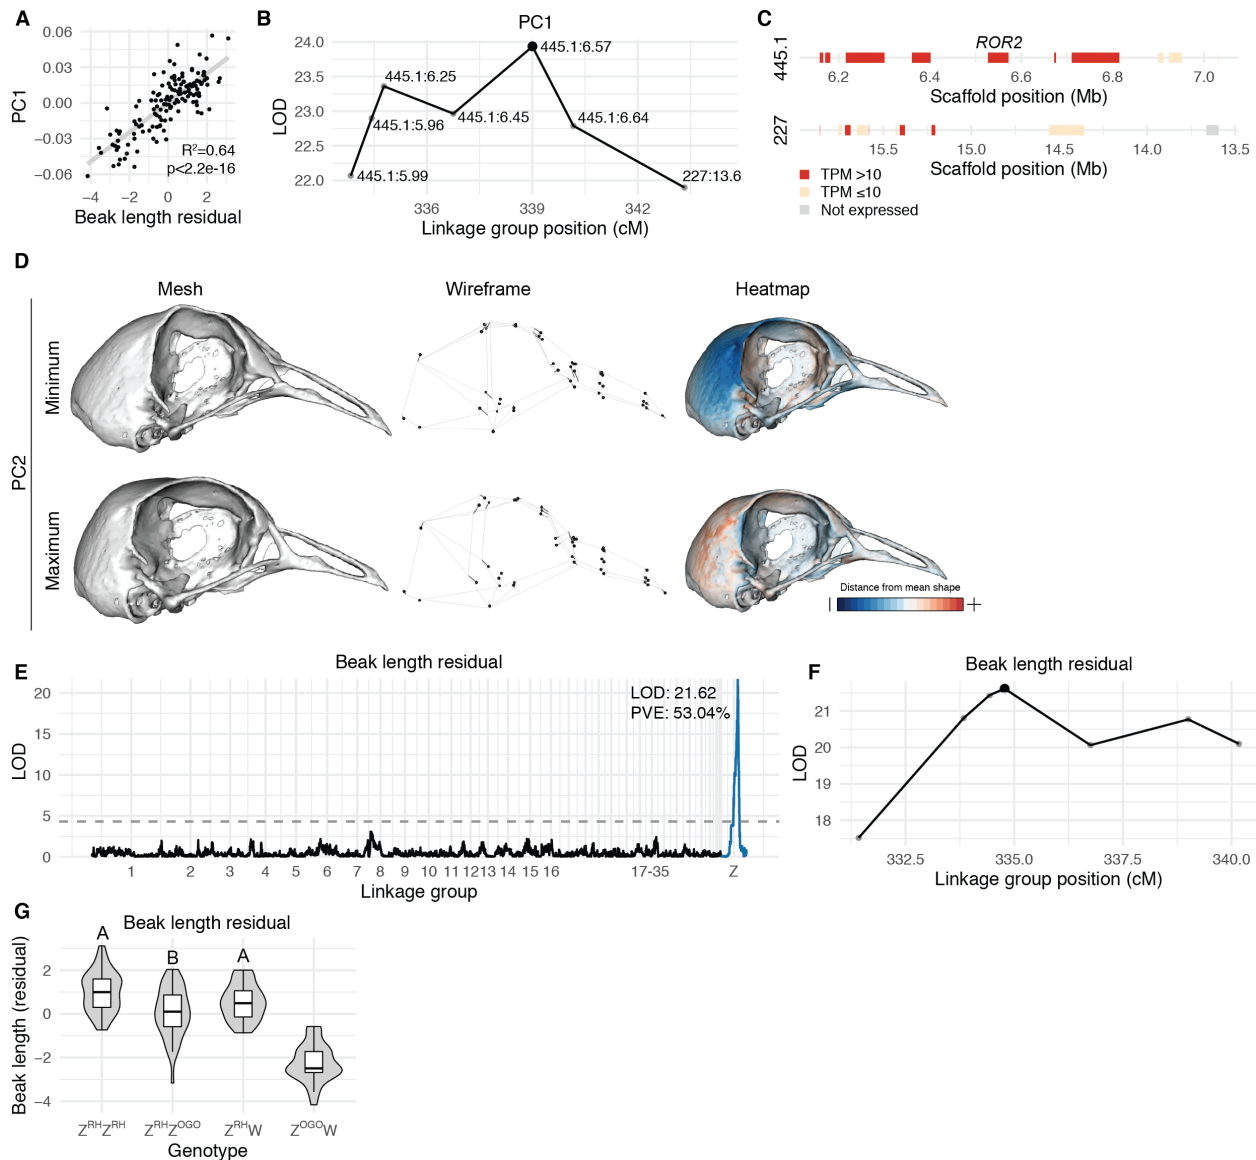

**Supplemental Figure 3. Geometric morphometric and QTL analysis of craniofacial skeleton shape in RH x OGO cross, related to Figures 1-2.** (A) Scatter plot of beak length residual vs. PC1 score for all RH x OGO F<sub>2</sub> individuals. (B) LOD support interval for PC1 QTL peak on Z. Markers in interval are denoted with dots and labeled with genomic scaffold name (ScoHet5\_445.1 or ScoHet5\_227) and position (in Mb); black dot indicates QTL peak marker (ScoHet5\_445.1:6.57-Mb), which was used to estimate QTL effects. (C) Genes in PC1 QTL interval, color-coded by mRNA expression level in facial primordia derived from HH29 RH embryos. *ROR2* is located directly under QTL peak. (D) Minimum and maximum PC2 shapes depicted as warped mesh (left), wireframe showing landmark displacement (center), or heatmap indicating regional shape changes (right). For mesh and wireframe models, shape change is magnified 1.5x to aid visualization. (E) Genome-wide QTL scan for beak length using residuals from beak length ~ body mass linear regression. (F) LOD support interval is nearly identical to PC1 QTL interval (displayed in Figure 2D). Genes in interval on ScoHet5\_445.1 are displayed at bottom and color-coded by expression level. (G) Plot of QTL effects, using peak marker highlighted by black dot in (F).

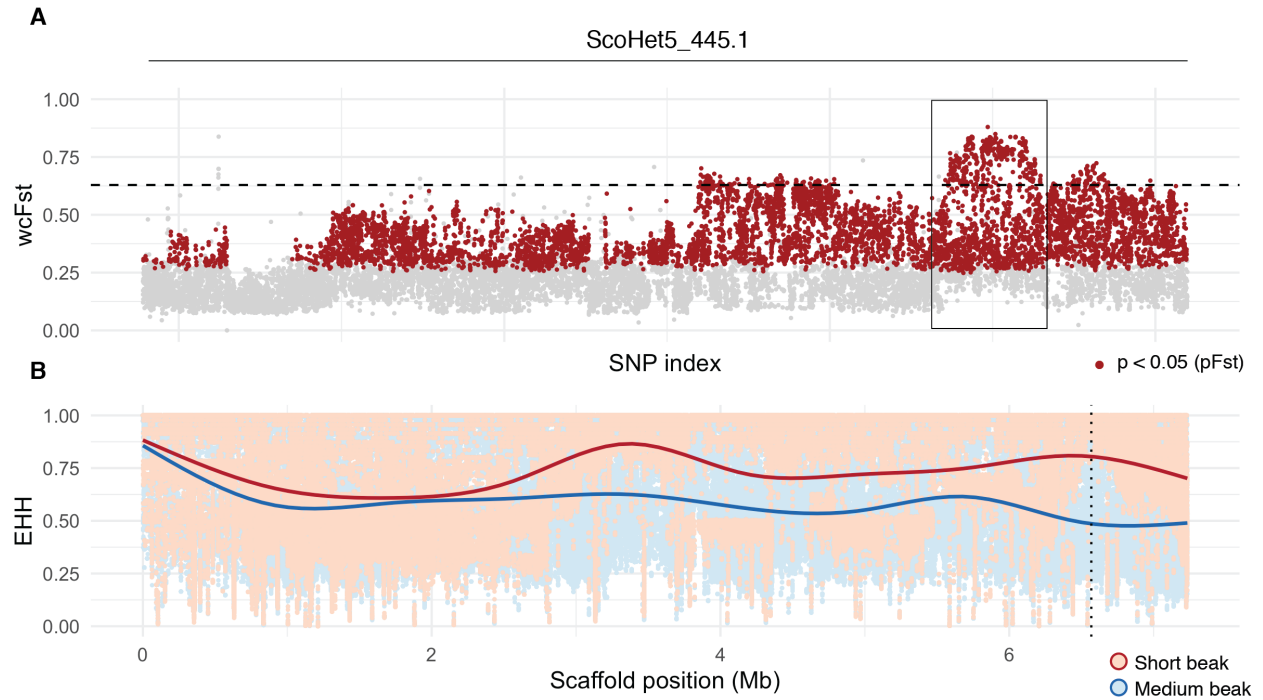

**Supplemental Figure 4. Allele frequency differentiation ( $F_{ST}$ ) and extended haplotype homozygosity (EHH) on scaffold ScoHet5\_445.1 in short and medium/long beak pigeons, related to Figure 3. (A)  $F_{ST}$  on ScoHet5\_445.1. Boxed region indicates ~293-kb peak region displayed in Figure 3D-E. (B) EHH on ScoHet5\_445.1. Smoothed lines represent local regression fitting; dotted vertical line indicates position of ScoHet5\_445.1:6568443.**

**Supplemental Table 1. Description of skull and jaw landmarks, related to Figures 1-2.**

| Landmark | Location                                                   | Side    | Group    | Type      |
|----------|------------------------------------------------------------|---------|----------|-----------|
| 1        | Nasal                                                      | Midline | Beak     | Midline   |
| 2        | Premaxillary bone; distal tip                              | Midline | Beak     | Midline   |
| 3        | Supraoccipital bone                                        | Midline | Skull    | Midline   |
| 4        | Jugal bone; lateral point                                  | Left    | Skull    | Bilateral |
| 5        | Jugal bone; lateral point                                  | Right   | Skull    | Bilateral |
| 6        | Junction of maxilla and nasal                              | Left    | Beak     | Bilateral |
| 7        | Junction of maxilla and nasal                              | Right   | Beak     | Bilateral |
| 8        | Lacrimal bone; inferior and lateral tip                    | Left    | Skull    | Bilateral |
| 9        | Lacrimal bone; inferior and lateral tip                    | Right   | Skull    | Bilateral |
| 10       | Lateral junction between lacrimal and frontal              | Left    | Skull    | Bilateral |
| 11       | Lateral junction between lacrimal and frontal              | Right   | Skull    | Bilateral |
| 12       | Lateralmost point of anterior orbital rim                  | Left    | Skull    | Bilateral |
| 13       | Lateralmost point of anterior orbital rim                  | Right   | Skull    | Bilateral |
| 14       | Quadrate bone; proximal tip                                | Left    | Skull    | Bilateral |
| 15       | Quadrate bone; proximal tip                                | Right   | Skull    | Bilateral |
| 16       | Junction of premaxillary and nasal distal                  | Left    | Beak     | Bilateral |
| 17       | Junction of premaxillary and nasal distal                  | Right   | Beak     | Bilateral |
| 18       | Dorsal process on premaxillary                             | Left    | Beak     | Bilateral |
| 19       | Dorsal process on premaxillary                             | Right   | Beak     | Bilateral |
| 20       | Distal tip of supraorbital process                         | Left    | Skull    | Bilateral |
| 21       | Distal tip of supraorbital process                         | Right   | Skull    | Bilateral |
| 22       | Edge of nasal bone where shape changes                     | Left    | Beak     | Bilateral |
| 23       | Edge of nasal bone where shape changes                     | Right   | Beak     | Bilateral |
| 24       | Eustachian opening and foramen                             | Midline | Skull    | Midline   |
| 25       | Dorsal surface of nasal bone                               | Right   | Beak     | Bilateral |
| 26       | Dorsal surface of nasal bone                               | Left    | Beak     | Bilateral |
| 27       | Lateralmost point of posterior orbital rim                 | Left    | Skull    | Bilateral |
| 28       | Lateralmost point of posterior orbital rim                 | Right   | Skull    | Bilateral |
| 29       | Basioccipital bone; most ventral/lateral point             | Midline | Skull    | Midline   |
| 30       | Midline of frontal bone                                    | Midline | Skull    | Midline   |
| 31       | Base of skull                                              | Midline | Skull    | Midline   |
| 32       | Midline of nasal bone; distal to s0                        | Midline | Beak     | Midline   |
| 33       | Midline of premaxillary bone; dorsal tip                   | Midline | Beak     | Midline   |
| 34       | Midline of frontal bone                                    | Midline | Skull    | Midline   |
| 35       | Caudal/dorsal tip of lateral process of mandible           | Left    | Mandible | Bilateral |
| 36       | Caudal/dorsal tip of lateral process of mandible           | Right   | Mandible | Bilateral |
| 37       | Caudal/ventral tip of lateral process of mandible          | Left    | Mandible | Bilateral |
| 38       | Caudal/ventral tip of lateral process of mandible          | Right   | Mandible | Bilateral |
| 39       | Medialmost tip of medial process of mandible               | Left    | Mandible | Bilateral |
| 40       | Medialmost tip of medial process of mandible               | Right   | Mandible | Bilateral |
| 41       | Ventralmost point of junction of dentary bones of mandible | Midline | Mandible | Midline   |
| 42       | Distal tip of mandible                                     | Midline | Mandible | Midline   |
| 43       | Dorsalmost point of dentary bone of mandible               | Left    | Mandible | Bilateral |
| 44       | Dorsalmost point of dentary bone of mandible               | Right   | Mandible | Bilateral |
| 45       | Rostral boundary of crest on dentary bone of mandible      | Left    | Mandible | Bilateral |
| 46       | Rostral boundary of crest on dentary bone of mandible      | Right   | Mandible | Bilateral |
| 47       | Ventral edge of mandible; below s24                        | Right   | Mandible | Bilateral |
| 48       | Ventral edge of mandible; below s25                        | Left    | Mandible | Bilateral |

|    |                                    |         |          |           |
|----|------------------------------------|---------|----------|-----------|
| 49 | Junction of palatine and pterygoid | Left    | Skull    | Bilateral |
| 50 | Junction of palatine and pterygoid | Right   | Skull    | Bilateral |
| 51 | Coronoid process of mandible       | Left    | Mandible | Bilateral |
| 52 | Coronoid process of mandible       | Right   | Mandible | Bilateral |
| 53 | Lateral edge of basioccipital      | Left    | Skull    | Bilateral |
| 54 | Lateral edge of basioccipital      | Right   | Skull    | Bilateral |
| 55 | Ventral point on mandible          | Left    | Mandible | Bilateral |
| 56 | Ventral point on mandible          | Right   | Mandible | Bilateral |
| 57 | Dorsal orbital rim                 | Left    | Skull    | Bilateral |
| 58 | Dorsal orbital rim                 | Right   | Skull    | Bilateral |
| 59 | Midline of frontal bone            | Midline | Skull    | Midline   |
| 60 | Ventral point on mandible          | Left    | Mandible | Bilateral |
| 61 | Ventral point on mandible          | Right   | Mandible | Bilateral |
| 62 | Dorsal point on mandible           | Left    | Mandible | Bilateral |
| 63 | Dorsal point on mandible           | Right   | Mandible | Bilateral |
| 64 | Ventral point on maxilla           | Left    | Beak     | Bilateral |
| 65 | Ventral point on maxilla           | Right   | Beak     | Bilateral |
| 66 | Ventral point on premaxillary      | Left    | Beak     | Bilateral |
| 67 | Ventral point on premaxillary      | Right   | Beak     | Bilateral |
| 68 | Back of skull                      | Midline | Skull    | Midline   |
| 69 | Dorsal point on mandible           | Left    | Mandible | Bilateral |
| 70 | Dorsal point on mandible           | Right   | Mandible | Bilateral |
| 71 | Lateral edge of nasal bone         | Right   | Beak     | Bilateral |
| 72 | Lateral edge of nasal bone         | Left    | Beak     | Bilateral |
| 73 | Supraoccipital bone                | Midline | Skull    | Midline   |

**Supplemental Table 2. Genes in the PC1 QTL interval, related to Figure 2.**

| gene_name | transcript_id   | scaf          | start    | end      | +/- | hh29_UB<br>mean_TPM | log2FC | padj |
|-----------|-----------------|---------------|----------|----------|-----|---------------------|--------|------|
| HINT1     | A306_00009604RA | ScoHet5_445.1 | 6159145  | 6166612  | -   | 157.67              | 0.05   | 1.00 |
| LYRM7     | A306_00009605RB | ScoHet5_445.1 | 6171150  | 6182072  | +   | 16.76               | 0.11   | 1.00 |
| CDC42SE2  | A306_00009606RA | ScoHet5_445.1 | 6216144  | 6300706  | +   | 34.64               | 0.11   | 0.89 |
| SPTLC1    | A306_00009607RA | ScoHet5_445.1 | 6360869  | 6401521  | +   | 28.17               | -0.09  | 0.97 |
| ROR2      | A306_00009608RA | ScoHet5_445.1 | 6527151  | 6572089  | +   | 77.00               | -0.03  | 1.00 |
| NFIL3     | A306_00009609RA | ScoHet5_445.1 | 6672005  | 6675999  | +   | 18.23               | -0.10  | 1.00 |
| AUH       | A306_00009610RA | ScoHet5_445.1 | 6710427  | 6814414  | +   | 11.79               | 0.08   | 1.00 |
| TPPP2     | A306_00009612RB | ScoHet5_445.1 | 6900579  | 6910482  | +   | 0.31                | NA     | NA   |
| SYK       | A306_00009613RA | ScoHet5_445.1 | 6923332  | 6951239  | -   | 0.76                | 0.04   | 1.00 |
| DIRAS2    | A306_00009614RA | ScoHet5_445.1 | 7030905  | 7031731  | +   | 0.80                | -0.37  | 1.00 |
| GADD45G   | A306_00008003RA | ScoHet5_227   | 15860157 | 15861535 | +   | 11.85               | -0.04  | 1.00 |
| SEMA4D    | A306_00008002RB | ScoHet5_227   | 15736305 | 15755614 | -   | 8.08                | -0.25  | 0.81 |
| SECISBP2  | A306_00008001RA | ScoHet5_227   | 15688753 | 15717766 | +   | 47.91               | -0.09  | 0.92 |
| CKS2      | A306_00008000RA | ScoHet5_227   | 15685310 | 15687317 | +   | 73.55               | 0.02   | 1.00 |
| SHC3      | A306_00007999RA | ScoHet5_227   | 15592914 | 15649490 | -   | 1.85                | -0.55  | 0.74 |
| S1PR3     | A306_00007998RA | ScoHet5_227   | 15580626 | 15582285 | +   | 177.86              | -0.01  | 1.00 |
| NXNL2     | A306_00007997RA | ScoHet5_227   | 15421761 | 15429938 | +   | 1.14                | 0.14   | 1.00 |
| SPIN1     | A306_00007996RA | ScoHet5_227   | 15377456 | 15406359 | +   | 139.72              | -0.04  | 1.00 |
| HIATL1    | A306_00007995RA | ScoHet5_227   | 15205161 | 15225885 | -   | 12.98               | -0.21  | 0.78 |
| CNTNAP4   | A306_00007994RA | ScoHet5_227   | 14358256 | 14557435 | -   | 0.82                | 0.20   | 1.00 |
| LRRRC2    | A306_00007993RA | ScoHet5_227   | 13594215 | 13664317 | +   | 0.02                | -0.40  | NA   |
